# Supplementary material
Source: PubMed Central journal article supplement (PMC1743739)
Supplement: qualsafety_12_4_246__1.pdf [file qualsafety_12_4_246__1.pdf]

**If a second health problem was raised, please complete this side.**

Q11 What was the second health problem raised? .....

Q12 Did you feel you understood the patient's views about this health problem? Yes   
 No   
 I don't know

Q13 Did you feel you understood the patient's views about the treatment they would find acceptable? Yes   
 No   
 I don't know

Q14. Did you think the patient wanted a prescription for this health problem? Definitely   
 Probably   
 Probably not   
 Definitely not   
 I don't know   
 Don't think patient knew

Q15. Did you feel pressured by the patient to write a prescription? Definitely pressured   
 A little pressured   
 Not at all pressured

Q16. Did you write a prescription for this problem? Yes   
 No

If yes, please give details of drug and dose, please circle whether new or repeat and whether this was strictly indicated on strictly medical grounds

| Drug (block capitals) | Dose | New or repeat? | Strictly indicated? |
|-----------------------|------|----------------|---------------------|
|                       |      | New / Repeat   | Yes / No            |
|                       |      | New / Repeat   | Yes / No            |
|                       |      | New / Repeat   | Yes / No            |

Q17. Did you feel comfortable about this prescribing decision? Definitely comfortable   
 Fairly comfortable   
 Slightly uncomfortable   
 Definitely uncomfortable

**Thank you for completing this. Please add any further comments you would like to make on this consultation.**
