# Supplementary material
Source: PubMed Central journal article supplement (PMC1743739)
Supplement: qualsafety_12_4_246__3.pdf [file qualsafety_12_4_246__3.pdf]

## REASONS FOR CONSULTING THE DOCTOR

*Here are some statements about the reasons why people go to see their doctor, and about what they want or expect from the doctor. Sometimes people have more than one health problem to discuss and we would like you to complete this questionnaire for your main reason and up to two others.*

*Thinking only about today's visit, please will you take a minute or two to answer each question. Your answers will be treated in confidence and will not be seen before you see the doctor.*

### A. What is the main health problem you wish to raise with the doctor today?

*Please state problem.....*

.....

Is it a new problem? Yes No

*Please answer all the questions for this problem. Circle 2 if you agree with the statement, 0 if you disagree, and 1 if you are uncertain or the question does not apply to you*

|                                                              | <u>AGREE</u> | <u>UNCERTAIN</u> | <u>DISAGREE</u> |
|--------------------------------------------------------------|--------------|------------------|-----------------|
| 1. I want the doctor to diagnose what is wrong with me       | 2            | 1                | 0               |
| 2. I want the doctor to talk with me about my problem        | 2            | 1                | 0               |
| 3. I want some tests done to find out what is wrong with me  | 2            | 1                | 0               |
| 4. I would like emotional support from the doctor            | 2            | 1                | 0               |
| 5. I want the doctor to listen to what I think is wrong      | 2            | 1                | 0               |
| 6. I want to be reassured that nothing is wrong with me      | 2            | 1                | 0               |
| 7. I want to be referred to a specialist                     | 2            | 1                | 0               |
| 8. I have emotional problems for which I would like help     | 2            | 1                | 0               |
| 9. I want to be examined for the cause of my condition       | 2            | 1                | 0               |
| 10. I want a prescription for some medication                | 2            | 1                | 0               |
| 11. I would like to be taken off some medication I am taking | 2            | 1                | 0               |
| 12. I want to change the medication I am taking              | 2            | 1                | 0               |
| 13. I want advice about medical treatment                    | 2            | 1                | 0               |
| 14. I want advice on medication/ medicines                   | 2            | 1                | 0               |
