# Supplementary material
Source: PubMed Central journal article supplement (PMC1743739)
Supplement: qualsafety_12_4_246__4.pdf [file qualsafety_12_4_246__4.pdf]

## AFTER THE CONSULTATION

*On your way out would you take a minute to answer these questions by circling which answer best describes your recent consultation with the doctor. Your response will be treated in confidence and will not be seen by the doctor*

*Thank you for completing this. Please put it in the box at reception before you leave, or use the freepost envelope*

**1. Did you raise all the health problems you wished to with the doctor?**

Yes                  No

**2. What was the main health problem discussed?**

.....

In connection with your main health problem:-

|                                                                         | <u>Agree</u>          | <u>Uncertain</u>        | <u>Disagree</u>              |
|-------------------------------------------------------------------------|-----------------------|-------------------------|------------------------------|
| 3. The doctor diagnosed my problem                                      | 2                     | 1                       | 0                            |
| 4. The doctor talked with me about my problem                           | 2                     | 1                       | 0                            |
| 5. The doctor gave me emotional support                                 | 2                     | 1                       | 0                            |
| 6. The doctor listened to what I think is wrong                         | 2                     | 1                       | 0                            |
| 7. I was reassured that nothing is wrong with me                        | 2                     | 1                       | 0                            |
| 8. The doctor helped me with my emotional problems                      | 2                     | 1                       | 0                            |
| 9. The doctor gave me advice on medication /medicines                   | 2                     | 1                       | 0                            |
| 10. The doctor explained the nature of my problem, and any side-effects | 2                     | 1                       | 0                            |
| 11. The doctor explained the treatment to me                            | 2                     | 1                       | 0                            |
| 12. The doctor listened to my views on the treatment I think I need     | 2                     | 1                       | 0                            |
| 13. I was offered a choice of treatments                                | 2                     | 1                       | 0                            |
| 14. I participated in decisions about my treatment                      | 2                     | 1                       | 0                            |
| 15. How satisfied were you with the consultation?                       | <i>Very satisfied</i> | <i>Fairly satisfied</i> | <i>A little dissatisfied</i> |
|                                                                         |                       |                         | <i>Very dissatisfied</i>     |
| 16. Did you feel your opinions were valued?                             | Yes                   |                         | No                           |
| 17. Did you receive a new prescription?                                 | Yes                   |                         | No                           |
| 18. Were you happy with the prescribing decision?                       | Yes                   |                         | No                           |

***Thank you for completing this. Please leave it in the box on your way out***
