# Supplementary material
Source: PubMed Central journal article supplement (PMC1743739)
Supplement: qualsafety_12_4_246__5.pdf [file qualsafety_12_4_246__5.pdf]

### Data Extraction Sheet - ver. 3

Date of consultation \_\_\_\_\_ Time \_\_\_\_\_

Name of patient \_\_\_\_\_ Date of Birth/ Age \_\_\_\_\_

| Reason for Encounter/ Problem Presented<br>(at this consultation) | Additional comments | Action taken<br>(if any) |     |       |
|-------------------------------------------------------------------|---------------------|--------------------------|-----|-------|
|                                                                   |                     | Rx                       | OTC | No Rx |
|                                                                   |                     |                          |     |       |
|                                                                   |                     |                          |     |       |
|                                                                   |                     |                          |     |       |
|                                                                   |                     |                          |     |       |
|                                                                   |                     |                          |     |       |
|                                                                   |                     |                          |     |       |
|                                                                   |                     |                          |     |       |
|                                                                   |                     |                          |     |       |

List all medicines prescribed or recommended ***at this consultation*** (including repeats)

| Medicine prescribed/<br>recommended<br>(incl. Dosage, regimen and<br>duration) | What prescribed for<br>(Indication) | When<br>started* | Comments† |
|--------------------------------------------------------------------------------|-------------------------------------|------------------|-----------|
|                                                                                |                                     |                  |           |
|                                                                                |                                     |                  |           |
|                                                                                |                                     |                  |           |
|                                                                                |                                     |                  |           |
|                                                                                |                                     |                  |           |
|                                                                                |                                     |                  |           |
|                                                                                |                                     |                  |           |
|                                                                                |                                     |                  |           |

\* 'n' = new; '<1m' = less than a month ago '>1m' = more than a month ago

if <1m give date started;

† if only otc recommendation write 'otc'; if medication to be dispensed later only if needed write 'deferred'

**Other actions taken at this consultation**

e.g. drug stopped/ dose altered (state drug); tests ordered; referral made etc.
